# Supplementary material
Source: publisher figshare collection journal article supplement (https://acs.figshare.com/ndownloader/files/23728281)
Supplement: Supplementary file 1 [file 23728281]

## $\beta$ -arrestin-2-Dependent Mechanism of GPR52 Signalling in Frontal Cortical Neurons

Cassandra J Hatzipantelis, Yao Lu, Daisy L Spark, Christopher J Langmead\* and Gregory D Stewart\*

*Drug Discovery Biology, Monash Institute of Pharmaceutical Sciences, Monash University, Parkville, VIC*

\*for correspondence [chris.langmead@monash.edu](mailto:chris.langmead@monash.edu) or [gregory.stewart@monash.edu](mailto:gregory.stewart@monash.edu)

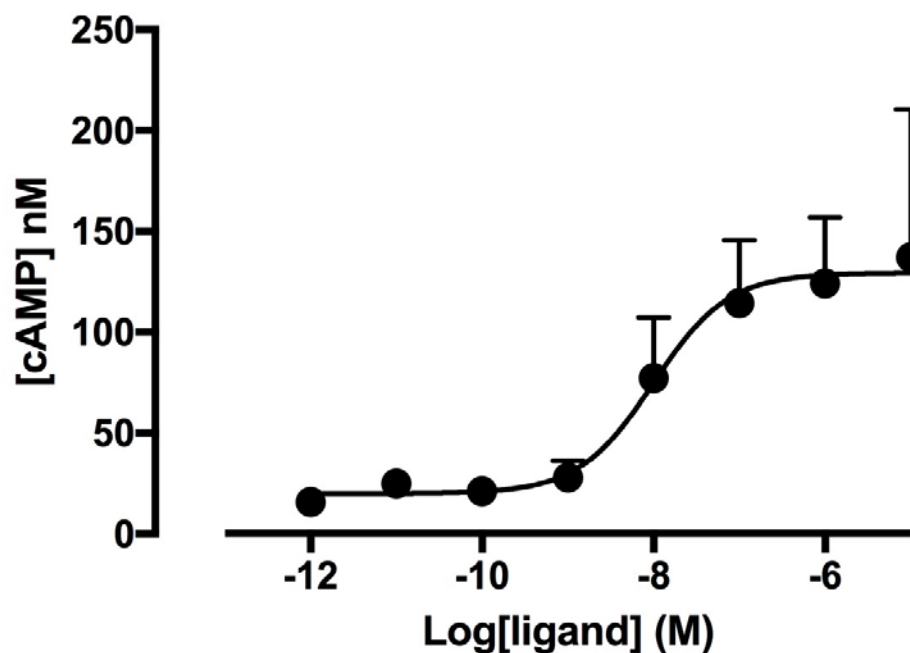

**Supplementary Figure 1: 3-BTBZ-induced cAMP signalling in HEK293T cells transiently expressing hGPR52.** Concentration-dependence of cAMP production induced by 3-BTBZ using the LANCE Ultra protocol (same protocol used in frontal cortical neurons). Data are presented as mean  $\pm$  SEM (n=3).

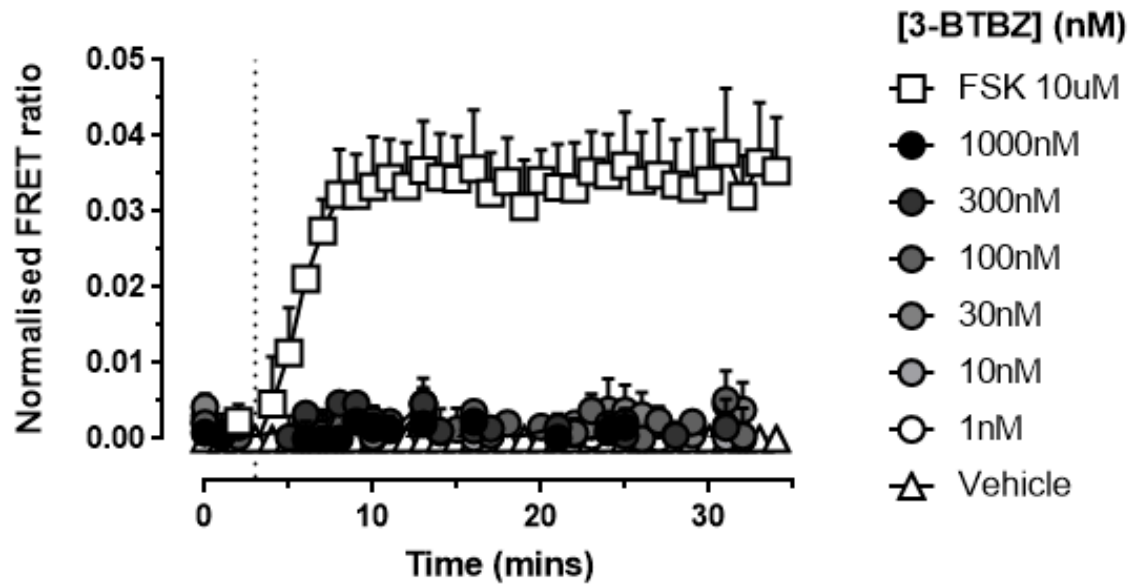

**Supplementary Figure 2: Lack of 3-BTBZ-induced cAMP-EPAC signalling in vector-transfected HEK293T cells expressing the EPAC FRET sensor.** 3-BTBZ does not induce cAMP-EPAC signalling in the absence of transfected GPR52 in contrast to the positive control, forskolin. Data are presented as mean values  $\pm$  SEM (n=3).

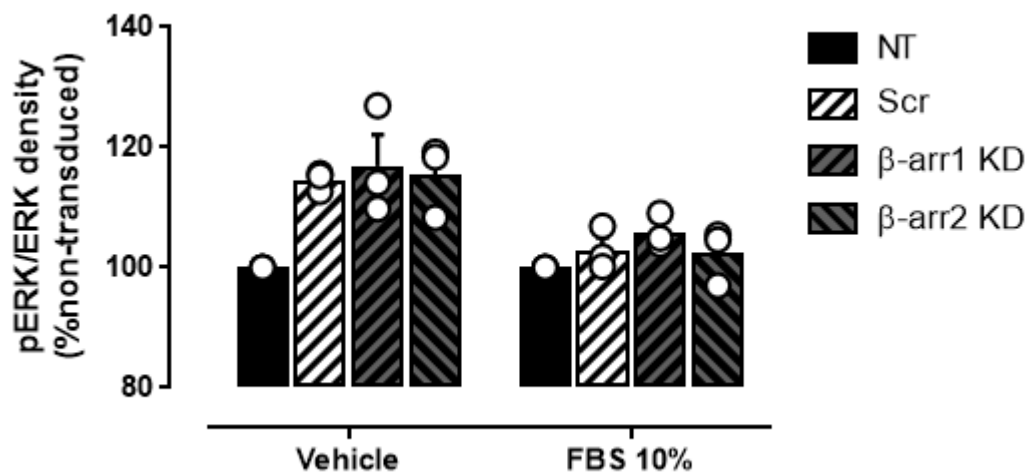

**Supplementary Figure 3: Effect of viral knockdown of  $\beta$ -arrestin-1 and -2 on baseline and 10% FBS-induced ERK1/2 phosphorylation in primary frontal cortical neurons.** There is no effect of viral knockdown of  $\beta$ -arrestin-1 and -2 on baseline- nor 10% FBS-induced ERK1/2 phosphorylation compared to scrambled ( $p > 0.05$ ). Data are presented as normalised individual values representing the mean of triplicates (n=3). NT, non-transduced; Scr, scrambled; KD, knockdown.

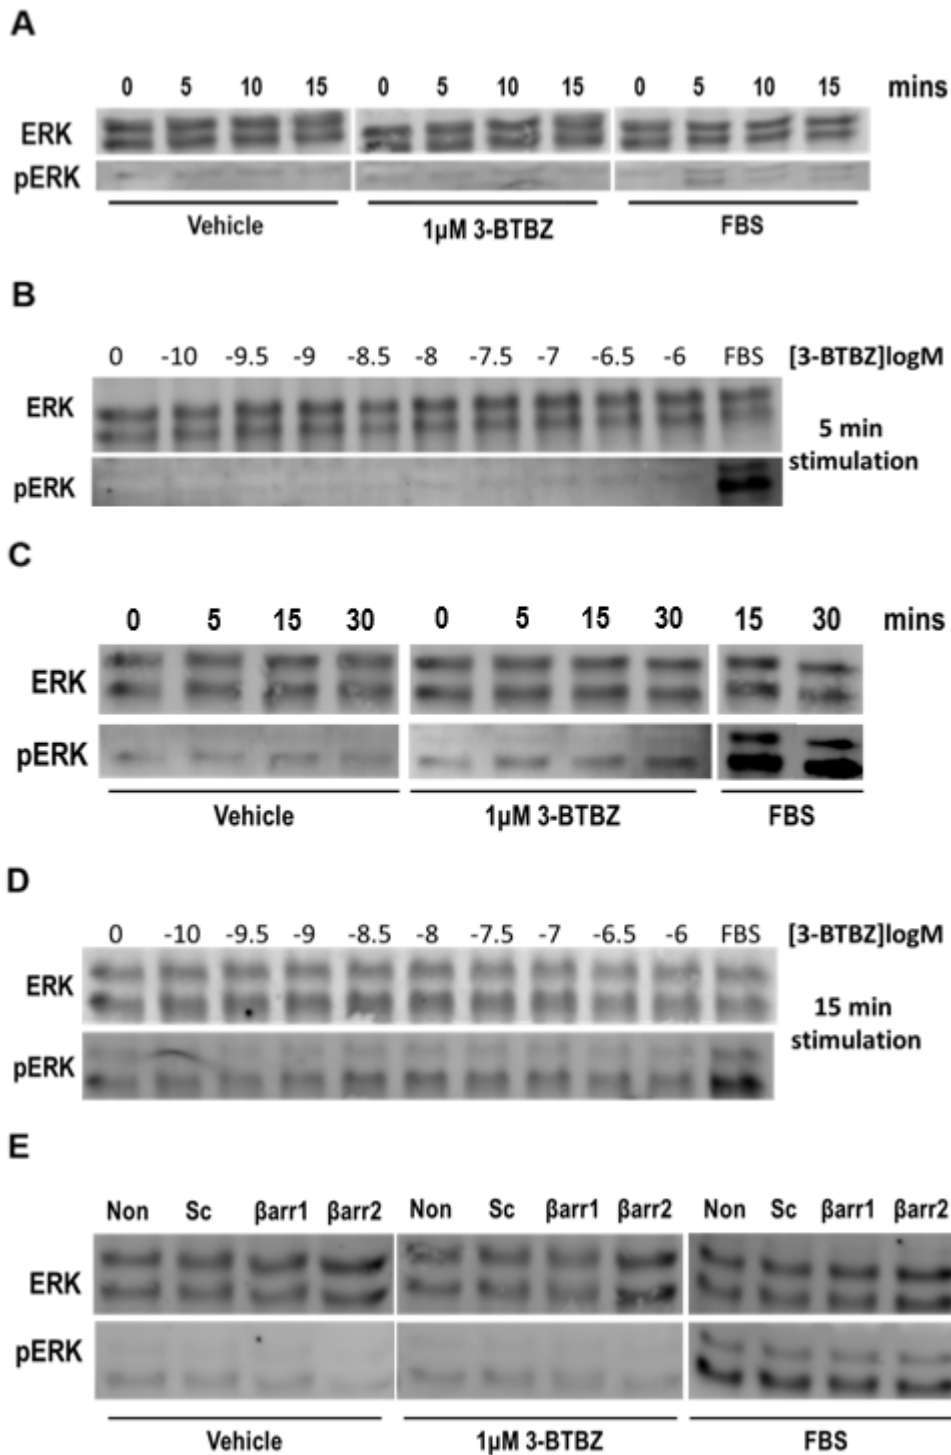

**Supplementary Figure 4: Representative western blots for ERK1/2 phosphorylation studies.** (A) Time-course experiments in hGPR52Nluc-HEK293T cells. (B) Concentration-response experiments in hGPR52Nluc-HEK293T cells. (C) Time-course experiments in frontal cortical neurons. (D) Concentration-response experiments in frontal cortical neurons. (E) Knockdown experiments in frontal cortical neurons. Bands were quantified by densitometry and the pERK/ERK ratio within the same lane was used to quantify ERK1/2 phosphorylation. Non, non-transduced; Sc, scrambled;  $\beta$ arr1,  $\beta$ -arrestin-1 knockdown;  $\beta$ arr2,  $\beta$ -arrestin-2 knockdown.
